# Supplementary material for: Assessment of Human Pharmaceuticals in Drinking Water Catchments, Tap and Drinking Fountain Waters
Source: MDPI journal article supplement (doi:10.3390/app11157062), 2021-07-30
Supplement: s1 [file s1]

# **Assessment of human pharmaceuticals in drinking water catchments, tap and drinking fountain waters**

André M.P.T. Pereira <sup>1,\*</sup>, Liliana J.G. Silva <sup>1</sup>, Célia S.M. Laranjeiro <sup>1</sup>, Angelina Pena <sup>1</sup>

<sup>1</sup> *LAQV, REQUIMTE, Laboratory of Bromatology and Pharmacognosy, Faculty of Pharmacy, University of Coimbra, Polo III, Azinhaga de St<sup>a</sup> Comba, 3000-548 Coimbra, Portugal*

## **\*Corresponding author:**

LAQV, REQUIMTE, Group of Bromatology, Pharmacognosy and Analytical Sciences, Faculty of Pharmacy, University of Coimbra

Pólo das Ciências da Saúde, Azinhaga de Santa Comba, 3000-548 Coimbra, Portugal.

Tel: +351239488400

Fax : +351239827126

## **E-mail addresses:**

amptpereira@gmail.com (A.M.P.T. Pereira), ljgsilva@hotmail.com (L.J.G. Silva),

celialaranjeiro@gmail.com (C.S.M. Laranjeiro), cmlino@ci.uc.pt (C. Lino),

apena@ci.uc.pt (A. Pena)

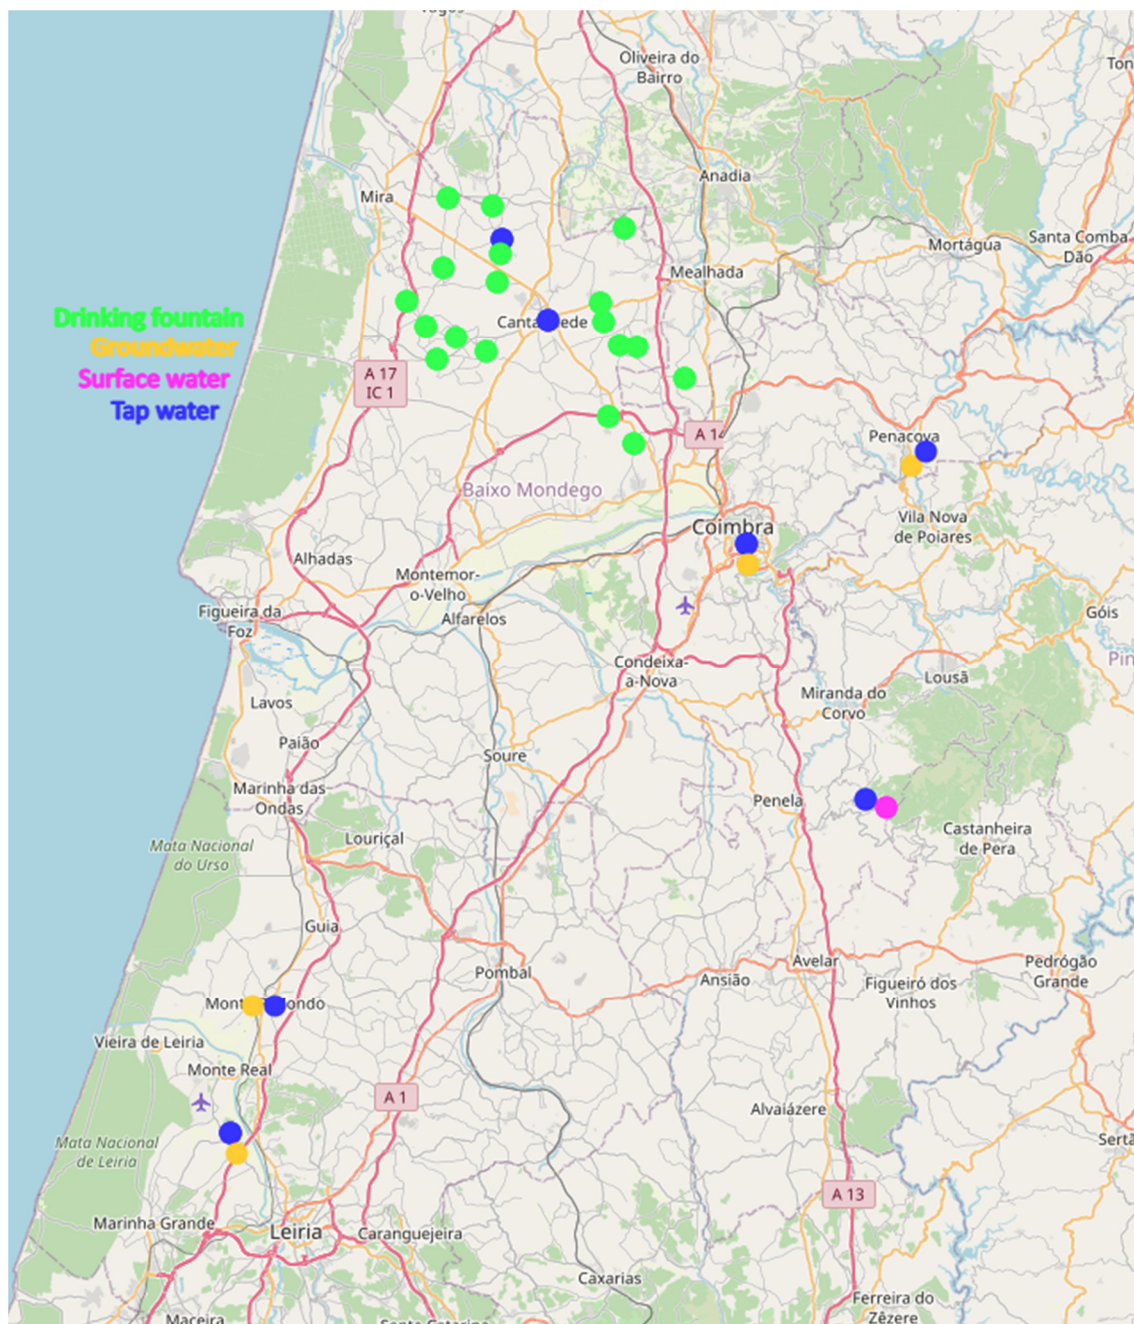

Figure S1. Sampling location.

Table S1. Sampling site and type of water

| Sampling number | Sampling site                  | Type of water     | pH   |
|-----------------|--------------------------------|-------------------|------|
| <b>G13</b>      | Franciscas                     | Drinking fountain | 7,4  |
| <b>G2</b>       | Fervença                       | Drinking fountain | 6,13 |
| <b>G5</b>       | Cadima                         | Drinking fountain | 6,95 |
| <b>G7</b>       | Fonte da Azenha (Fontinha)     | Drinking fountain | 7,12 |
| <b>G16</b>      | Corticeiro de Cima             | Drinking fountain | 6,2  |
| <b>G4</b>       | Olheiro (Sanguinheira)         | Drinking fountain | 6,98 |
| <b>G15</b>      | Cordinhã                       | Drinking fountain | 6,92 |
| <b>G18</b>      | Come Vacas (Cordinhã)          | Drinking fountain | 6,43 |
| <b>G19</b>      | Amieiras (São Caetano)         | Drinking fountain | 6,29 |
| <b>G20</b>      | Iséu (Ançã)                    | Drinking fountain | 6,8  |
| <b>G3</b>       | Casal do Netos                 | Drinking fountain | 6,32 |
| <b>G17</b>      | Corgo Enchieiro                | Drinking fountain | 5,66 |
| <b>G12</b>      | Ferraria (Barcouço)            | Drinking fountain | 5,64 |
| <b>G10</b>      | Sete-fontes                    | Drinking fountain | 6,18 |
| <b>G14</b>      | Freixial (Venda Nova do Bolho) | Drinking fountain | 6,04 |
| <b>G1</b>       | Porto-Sobreiro                 | Drinking fountain | 5,22 |
| <b>G11</b>      | Porto de Carros (Murte)de)     | Drinking fountain | 7,15 |
| <b>G6</b>       | Ançã                           | Drinking fountain | 6,79 |
| <b>G8</b>       | Febres                         | Tap water         | 7,15 |
| <b>G9</b>       | Cantanhede                     | Tap water         | 7,2  |
| <b>M1 - 9</b>   | Boavista WTP water catchment 1 | Groundwater       | 6.62 |
| <b>M1 - 10</b>  | Boavista WTP water catchment 2 | Groundwater       | 6.73 |
| <b>M1 - 3</b>   | Boavista WTP treated water     | Tap water         | 6.76 |
| <b>M1 - 1</b>   | Ronqueira WTP water catchment  | Groundwater       | 6.48 |
| <b>M1 - 4</b>   | Ronqueira WTP treated water    | Tap water         | 6.64 |
| <b>M1 - 5</b>   | Louçainha WTP water catchment  | Surface water     | 6.46 |
| <b>M1 - 8</b>   | Louçainha treated water        | Tap water         | 7.11 |
| <b>M1 - 11</b>  | Amor WTP water catchment       | Groundwater       | 6.89 |
| <b>M1 - 6</b>   | Amor WTP treated water         | Tap water         | 6.72 |
| <b>M1 - 2</b>   | Paúl WTP water catchment       | Groundwater       | 6.16 |
| <b>M1 - 7</b>   | Paúl WTP treated water         | Tap water         | 6.71 |
| <b>M2 - 9</b>   | Boavista WTP water catchment 1 | Groundwater       | 6.75 |
| <b>M2 - 10</b>  | Boavista WTP water catchment 2 | Groundwater       | 6.80 |
| <b>M2 - 3</b>   | Boavista WTP treated water     | Tap water         | 6.79 |
| <b>M2 - 1</b>   | Ronqueira WTP water catchment  | Groundwater       | 6.64 |
| <b>M2 - 4</b>   | Ronqueira WTP treated water    | Tap water         | 6.65 |
| <b>M2 - 5</b>   | Louçainha WTP water catchment  | Surface water     | 6.51 |
| <b>M2 - 8</b>   | Louçainha treated water        | Tap water         | 7.16 |
| <b>M2 - 11</b>  | Amor WTP water catchment       | Groundwater       | 6.99 |

|                |                               |               |      |
|----------------|-------------------------------|---------------|------|
| <b>M2 - 6</b>  | Amor WTP treated water        | Tap water     | 7.05 |
| <b>M2 - 2</b>  | Paúl WTP water catchment      | Groundwater   | 5.70 |
| <b>M2 - 7</b>  | Paúl WTP treated water        | Tap water     | 6.28 |
| <b>M3 - 9</b>  | Boavista WTP water cathment 1 | Groundwater   | 6.78 |
| <b>M3 - 10</b> | Boavista WTP water cathment 2 | Groundwater   | 6.81 |
| <b>M3 - 3</b>  | Boavista WTP treated water    | Tap water     | 6.86 |
| <b>M3 - 1</b>  | Ronqueira WTP water catchment | Groundwater   | 6.71 |
| <b>M3 - 4</b>  | Ronqueira WTP treated water   | Tap water     | 6.56 |
| <b>M3 - 5</b>  | Louçainha WTP water catchment | Surface water | 6.41 |
| <b>M3 - 8</b>  | Louçainha treated water       | Tap water     | 6.45 |
| <b>M3 - 11</b> | Amor WTP water catchment      | Groundwater   | 6.76 |
| <b>M3 - 6</b>  | Amor WTP treated water        | Tap water     | 6.89 |
| <b>M3 - 2</b>  | Paúl WTP water catchment      | Groundwater   | 5.60 |
| <b>M3 - 7</b>  | Paúl WTP treated water        | Tap water     | 7.56 |
| <b>M4 - 9</b>  | Boavista WTP water cathment 1 | Groundwater   | 6.74 |
| <b>M4 - 10</b> | Boavista WTP water cathment 2 | Groundwater   | 6.71 |
| <b>M4 - 3</b>  | Boavista WTP treated water    | Tap water     | 6.85 |
| <b>M4 - 1</b>  | Ronqueira WTP water catchment | Groundwater   | 6.70 |
| <b>M4 - 4</b>  | Ronqueira WTP treated water   | Tap water     | 6.48 |
| <b>M4 - 5</b>  | Louçainha WTP water catchment | Surface water | 6.56 |
| <b>M4 - 8</b>  | Louçainha treated water       | Tap water     | 7.35 |
| <b>M4 - 11</b> | Amor WTP water catchment      | Groundwater   | 6.75 |
| <b>M4 - 6</b>  | Amor WTP treated water        | Tap water     | 6.90 |
| <b>M4 - 2</b>  | Paúl WTP water catchment      | Groundwater   | 5.81 |
| <b>M4 - 7</b>  | Paúl WTP treated water        | Tap water     | 7.73 |
| <b>M5 - 9</b>  | Boavista WTP water cathment 1 | Groundwater   | 6.75 |
| <b>M5 - 10</b> | Boavista WTP water cathment 2 | Groundwater   | 6.67 |
| <b>M5 - 3</b>  | Boavista WTP treated water    | Tap water     | 6.96 |
| <b>M5 - 1</b>  | Ronqueira WTP water catchment | Groundwater   | 6.73 |
| <b>M5 - 4</b>  | Ronqueira WTP treated water   | Tap water     | 6.75 |
| <b>M5 - 5</b>  | Louçainha WTP water catchment | Surface water | 6.44 |
| <b>M5 - 8</b>  | Louçainha treated water       | Tap water     | 7.30 |
| <b>M5 - 11</b> | Amor WTP water catchment      | Groundwater   | 6.83 |
| <b>M5 - 6</b>  | Amor WTP treated water        | Tap water     | 6.79 |
| <b>M5 - 2</b>  | Paúl WTP water catchment      | Groundwater   | 5.68 |
| <b>M5 - 7</b>  | Paúl WTP treated water        | Tap water     | 7.88 |
| <b>M6 - 9</b>  | Boavista WTP water cathment 1 | Groundwater   | 6.68 |
| <b>M6 - 10</b> | Boavista WTP water cathment 2 | Groundwater   | 6.69 |
| <b>M6 - 3</b>  | Boavista WTP treated water    | Tap water     | 6.95 |
| <b>M6 - 1</b>  | Ronqueira WTP water catchment | Groundwater   | 6.67 |
| <b>M6 - 4</b>  | Ronqueira WTP treated water   | Tap water     | 9.48 |
| <b>M6 - 5</b>  | Louçainha WTP water catchment | Surface water | 6.36 |
| <b>M6 - 8</b>  | Louçainha treated water       | Tap water     | 7.42 |

|                |                               |               |      |
|----------------|-------------------------------|---------------|------|
| <b>M6 - 11</b> | Amor WTP water catchment      | Groundwater   | 6.93 |
| <b>M6 - 6</b>  | Amor WTP treated water        | Tap water     | 6.65 |
| <b>M6 - 2</b>  | Paúl WTP water catchment      | Groundwater   | 6.40 |
| <b>M6 - 7</b>  | Paúl WTP treated water        | Tap water     | 7.47 |
| <b>M7 - 9</b>  | Boavista WTP water cathment 1 | Groundwater   | 6.94 |
| <b>M7 - 10</b> | Boavista WTP water cathment 2 | Groundwater   | 6.77 |
| <b>M7 - 3</b>  | Boavista WTP treated water    | Tap water     | 6.98 |
| <b>M7 - 1</b>  | Ronqueira WTP water catchment | Groundwater   | 6.48 |
| <b>M7 - 4</b>  | Ronqueira WTP treated water   | Tap water     | 6.66 |
| <b>M7 - 5</b>  | Louçainha WTP water catchment | Surface water | 6.43 |
| <b>M7 - 8</b>  | Louçainha treated water       | Tap water     | 7.41 |
| <b>M7 - 11</b> | Amor WTP water catchment      | Groundwater   | 7.35 |
| <b>M7 - 6</b>  | Amor WTP treated water        | Tap water     | 6.59 |
| <b>M7 - 2</b>  | Paúl WTP water catchment      | Groundwater   | 5.81 |
| <b>M7 - 7</b>  | Paúl WTP treated water        | Tap water     | 7.55 |

Table S2. Gradient elution scheme.

| <b><i>TIME</i></b> | <b><i>%A</i></b> | <b><i>%B</i></b> |
|--------------------|------------------|------------------|
| <b>0.00</b>        | 90               | 10               |
| <b>3.00</b>        | 90               | 10               |
| <b>3.10</b>        | 55               | 45               |
| <b>5.00</b>        | 55               | 45               |
| <b>8.00</b>        | 15               | 85               |
| <b>9.00</b>        | 15               | 85               |
| <b>9.10</b>        | 5                | 95               |
| <b>14.00</b>       | 5                | 95               |
| <b>14.10</b>       | 90               | 10               |
| <b>30.00</b>       | 90               | 10               |

Table S3. Target compounds organized by therapeutic groups and their internal standards.

| Group                           | Target compound (C/M)               |                  |     |                |           |                                                   |                                           | Internal Standard (IS)                    |                            |          |                                                   |                                           |                                             |    |
|---------------------------------|-------------------------------------|------------------|-----|----------------|-----------|---------------------------------------------------|-------------------------------------------|-------------------------------------------|----------------------------|----------|---------------------------------------------------|-------------------------------------------|---------------------------------------------|----|
|                                 | Compound                            |                  | MW  | ESI-MS2        |           |                                                   |                                           | Compound                                  | MW                         | ESI-MS2  |                                                   |                                           |                                             |    |
|                                 |                                     |                  |     | RT range (min) | ESI mode  | MRM transitions (m/z) Precursor ion > Product ion |                                           |                                           |                            | ESI mode | MRM transitions (m/z) Precursor ion > Product ion |                                           |                                             |    |
| Antibiotics                     | Ciprofloxacin (CIP)                 | C                | 331 | 14.05-14.15    | PI        | m/z 332 ( M+H +) > m/z 314 ( M+H-H2O +)           | QP                                        | Ciprofloxacin D8 (CIP-D8)                 | 339                        | PI       | m/z 340 ( M+H +) > m/z 322 ( M+H-H2O +)           | QP                                        |                                             |    |
|                                 |                                     |                  |     |                |           | m/z 332 ( M+H +) > m/z 288 ( M+H-CO2 +)           | CP                                        |                                           |                            |          | m/z 340 ( M+H +) > m/z 296 ( M+H-CO2 +)           | CP                                        |                                             |    |
|                                 | Erythromycin (ERY)                  | C                | 733 | 17.09-17.20    | PI        | m/z 734 ( M+H +) > m/z 576 ( M+H-C8H14O3 +)       | QP                                        | Azithromycin D3 (AZI-D3)                  | 751                        | PI       | m/z 752 ( M+H +) > m/z 594 ( M+H-C8H14O3 +)       | QP                                        |                                             |    |
|                                 |                                     |                  |     |                |           | m/z 734 ( M+H +) > m/z 716 ( M+H-H2O +)           | CP                                        |                                           |                            |          |                                                   |                                           |                                             |    |
|                                 | Azithromycin (AZI)                  | C                | 748 | 17.30-17.55    | PI        | m/z 749 ( M+H +) > m/z 591 ( M+H-C8H14O3 +)       | QP                                        |                                           |                            |          |                                                   |                                           | m/z 752 ( M+H +) > m/z 576 ( M+H-C8H16O4 +) | CP |
|                                 |                                     |                  |     |                |           | m/z 749 ( M+H +) > m/z 573 ( M+H-C8H16O4 +)       | CP                                        |                                           |                            |          |                                                   |                                           |                                             |    |
|                                 | Clarithromycin (CLA)                | C                | 747 | 17.54-17.63    | PI        | m/z 748 ( M+H +) > m/z 590 ( M+H-C8H14O3 +)       | QP                                        |                                           |                            |          | m/z 748 ( M+H +) > m/z 558 ( M+H-C8H14NO3-H2O +)  | CP                                        |                                             |    |
|                                 |                                     |                  |     |                |           | m/z 748 ( M+H +) > m/z 558 ( M+H-C8H14NO3-H2O +)  | CP                                        |                                           |                            |          |                                                   |                                           |                                             |    |
|                                 | Anti-inflammatory and/or analgesics | Diclofenac (DIC) | C   | 295            | 8.40-8.60 | PI                                                | m/z 296 ( M+H +) > m/z 278 ( M+H-H2O +)   | QP                                        | Diclofenac 13C6 (DIC-13C6) | 301      | PI                                                | m/z 302 ( M+H +) > m/z 284 ( M+H-H2O +)   | QP                                          |    |
|                                 |                                     |                  |     |                |           |                                                   | m/z 296 ( M+H +) > m/z 250 ( M+H-CH2O2 +) | CP                                        |                            |          |                                                   | m/z 302 ( M+H +) > m/z 256 ( M+H-CH2O2 +) | CP                                          |    |
| 4-hidroxy-diclofenac (4-OH-DIC) |                                     | M                | 311 | 8.80-8.90      | PI        | m/z 312 ( M+H +) > m/z 294 ( M+H-H2O +)           | QP                                        | 4-hidroxy-diclofenac 13C6 (4-OH-DIC-13C6) | 317                        | PI       | m/z 318 ( M+H +) > m/z 300 ( M+H-H2O +)           | QP                                        |                                             |    |
|                                 |                                     |                  |     |                |           | m/z 312 ( M+H +) > m/z 250 ( M+H-H2O-CO2 +)       | CP                                        |                                           |                            |          | m/z 318 ( M+H +) > m/z 256 ( M+H-H2O-CO2 +)       | CP                                        |                                             |    |
| Naproxen (NAP)                  |                                     | C                | 230 | 7.15-7.30      | PI        | m/z 231 ( M+H +) > m/z 185 ( M+H-CH2O2 +)         | QP                                        |                                           | 209                        | PI       | m/z 210 ( M+H +) > m/z 164 ( M+H-CH2O2 +)         | QP                                        |                                             |    |

| Group             | Target compound (C/M) |   |     |                |          |                                                   |    | Internal Standard (IS)    |     |          |                                                   |    |  |
|-------------------|-----------------------|---|-----|----------------|----------|---------------------------------------------------|----|---------------------------|-----|----------|---------------------------------------------------|----|--|
|                   | Compound              |   | MW  | ESI-MS2        |          |                                                   |    | Compound                  | MW  | ESI-MS2  |                                                   |    |  |
|                   |                       |   |     | RT range (min) | ESI mode | MRM transitions (m/z) Precursor ion > Product ion |    |                           |     | ESI mode | MRM transitions (m/z) Precursor ion > Product ion |    |  |
|                   |                       |   |     |                |          |                                                   |    |                           |     |          |                                                   |    |  |
|                   |                       |   |     |                |          | m/z 231 ( M+H +) > m/z 213 ( M+H-H2O +)           | CP | Ibuprofen D3 (IBP-D3)     |     |          |                                                   |    |  |
|                   | Ibuprofen (IBU)       | C | 206 | 6.50-6.67      | PI       | m/z 207 ( M+H +) > m/z 161 ( M+HCH2O2 +)          | QP |                           |     |          | m/z 210 ( M+H +) > m/z 192 ( M+H-H2O +)           | CP |  |
|                   |                       |   |     |                |          | m/z 207 ( M+H +) > m/z 189 ( M+H-H2O +)           | CP |                           |     |          |                                                   |    |  |
|                   | Paracetamol (PARA)    | C | 151 | 5.95-6.10      | PI       | m/z 152 ( M+H +) > m/z 134 ( M+H-H2O +)           | QP | Acetaminophen D4 (ACE-D4) | 155 | PI       | m/z 156 ( M+H +) > m/z 138 ( M+H-H2O +)           | QP |  |
|                   |                       |   |     |                |          | m/z 152 ( M+H +) > m/z 110 ( M+H-C2H2O +)         | CP |                           |     |          |                                                   |    |  |
| Psychiatric drugs | Citalopram (CIT)      | C | 324 | 10.70-10.82    | PI       | m/z 325 ( M+H +) > m/z 262 ( M+H-C2H9NO +)        | QP | Citalopram D6 (CIT- D6)   | 330 | PI       | m/z 331 ( M+H +) > m/z 262 ( M+H-C2H3D6NO +)      | QP |  |
|                   |                       |   |     |                |          | m/z 325 ( M+H +) > m/z 234 ( M+H-C4H13NO +)       | CP |                           |     |          | m/z 331 ( M+H +) > m/z 234 ( M+H-C4H7D6NO +)      | CP |  |
|                   | Fluoxetine (FLU)      | C | 309 | 11.55-11.64    | PI       | m/z 310 ( M+H +) > m/z 148 ( M+H-C7H5F3O +)       | QP | Fluoxetine D5 (FLU- D5)   | 314 | PI       | m/z 315 ( M+H +) > m/z 153 ( M+H-C7H5F3O +)       | QP |  |
|                   |                       |   |     |                |          | m/z 310 ( M+H +) > m/z 117 ( M+H-C8H10F3NO +)     | CP |                           |     |          | m/z 315 ( M+H +) > m/z 122 ( M+H-C8H10F3NO +)     | CP |  |
|                   | Sertraline (SER)      | C | 305 | 13.71-13.83    | PI       | m/z 306 ( M+H +) > m/z 275 ( M+H-CH5N +)          | QP | Sertraline D3 (SER-D3)    | 308 | PI       | m/z 309 ( M+H +) > m/z 275 ( M+H-CH2D3N +)        | QP |  |
|                   |                       |   |     |                |          | m/z 306 ( M+H +) > m/z 159 ( M+H-C10H13N +)       | CP |                           |     |          | m/z 309 ( M+H +) > m/z 159 ( M+H-C10H10D3N +)     | CP |  |
|                   |                       |   |     |                |          |                                                   |    |                           |     |          |                                                   |    |  |
|                   |                       |   |     |                |          |                                                   |    |                           |     |          |                                                   |    |  |
| Lipid regulators  | Gemfibrozil (GEM)     | C | 250 | 15.48-15.57    | PI       | m/z 251 ( M+H +) > m/z 121 ( M+H-C7H14O2 +)       | QP | Gemfibrozil D6 (GFZ-D6)   | 256 | PI       | m/z 257 ( M+H +) > m/z 121 ( M+H-C7H8D6O2 +)      | QP |  |
|                   |                       |   |     |                |          | m/z 251 ( M+H +) > m/z 233 ( M+H-H2O +)           | CP |                           |     |          | m/z 257 ( M+H +) > m/z 239 ( M+H-H2O +)           | CP |  |

| Group                                        | Target compound (C/M)      |   |     |                |                                            |                                                   |                                           | Internal Standard (IS)       |                         |          |                                                   |                                            |                                           |
|----------------------------------------------|----------------------------|---|-----|----------------|--------------------------------------------|---------------------------------------------------|-------------------------------------------|------------------------------|-------------------------|----------|---------------------------------------------------|--------------------------------------------|-------------------------------------------|
|                                              | Compound                   |   | MW  | ESI-MS2        |                                            |                                                   |                                           | Compound                     | MW                      | ESI-MS2  |                                                   |                                            |                                           |
|                                              |                            |   |     | RT range (min) | ESI mode                                   | MRM transitions (m/z) Precursor ion > Product ion |                                           |                              |                         | ESI mode | MRM transitions (m/z) Precursor ion > Product ion |                                            |                                           |
|                                              | Bezafibrate (BEZ)          |   | C   | 361            | 16.00-16.28                                | PI                                                | m/z 362 ( M+H +) > m/z 316 ( M+H-CH2O2 +) | QP                           | Bezafibrate D4 (BZF-D4) |          | 365                                               | PI                                         | m/z 366 ( M+H +) > m/z 320 ( M+H-CH2O2 +) |
|                                              |                            |   |     |                |                                            | m/z 362 ( M+H +) > m/z 276 ( M+H-C4H6O2 +)        | CP                                        |                              |                         |          |                                                   | m/z 366 ( M+H +) > m/z 280 ( M+H-C4H6O2 +) | CP                                        |
| Hormones                                     | Estrone (E1)               | C | 270 | 8.95-9.21      | NI                                         | m/z 269 ( M-H -) > m/z 145 ( M-H-C6H12O -)        | QP                                        | Estradiol D5 (E2-D5)         | 277                     | NI       | m/z 276 ( M-H -) > m/z 185 ( M-H-C5H9D3O -)       | QP                                         |                                           |
|                                              |                            |   |     |                | m/z 269 ( M-H -) > m/z 159 ( M-H-C7H10O -) | CP                                                |                                           |                              |                         |          |                                                   |                                            |                                           |
|                                              | 17β-estradiol (E2)         | C | 272 | 9.27-9.39      | NI                                         | m/z 271 ( M-H -) > m/z 183 ( M-H-C5H12O -)        | QP                                        |                              |                         |          |                                                   |                                            |                                           |
|                                              |                            |   |     |                |                                            | m/z 271 ( M-H -) > m/z 145 ( M-H-C8H14O -)        | CP                                        |                              |                         |          |                                                   |                                            |                                           |
|                                              | 17α-ethinylestradiol (EE2) | C | 296 | 9.81-9.95      | NI                                         | m/z 295 ( M-H -) > m/z 185 ( M-H-C7H10O -)        | QP                                        |                              |                         |          |                                                   |                                            |                                           |
|                                              |                            |   |     |                |                                            | m/z 295 ( M-H -) > m/z 159 ( M-H-C9H12O -)        | CP                                        |                              |                         |          |                                                   |                                            |                                           |
| m/z 276 ( M-H -) > m/z 147 ( M-H-C8H11D3O -) | CP                         |   |     |                |                                            |                                                   |                                           |                              |                         |          |                                                   |                                            |                                           |
|                                              |                            |   |     |                |                                            |                                                   |                                           |                              |                         |          |                                                   |                                            |                                           |
| Antiepileptics                               | Carbamazepine (CAR)        | C | 236 | 15.22-15.35    | PI                                         | m/z 237 ( M+H +) > m/z 194 ( M+H-CHNO +)          | QP                                        | Carbamazepine D10 (CBZ- D10) | 246                     | PI       | m/z 247 ( M+H +) > m/z 204 ( M+H-CHNO +)          | QP                                         |                                           |
|                                              |                            |   |     |                |                                            | m/z 237 ( M+H +) > m/z 220 ( M+H-NH3 +)           | CP                                        |                              |                         |          |                                                   |                                            | m/z 247 ( M+H +) > m/z 230 ( M+H-NH3 +)   |
|                                              |                            |   |     |                |                                            |                                                   |                                           |                              |                         |          |                                                   |                                            |                                           |

C: compound; M: metabolite; ESI: electrospray ionization; PI: positive ionization mode; NI: negative ionization mode; RT: retention time; MW: Molecular weight; MRM: Multiple Reaction Monitoring; QP: quantification purpose; CP: confirmation purpose



Table S4. Analytical quality control for the quantification of each pharmaceutical in water.

| Therapeutic group /<br>compound | Matrix Matched<br>Linearity ( <i>R</i> <sup>2</sup> ) | MDL<br>(ng L <sup>-1</sup> ) | MQL<br>(ng L <sup>-1</sup> ) | ME<br>(%) | Recovery (%)    |                 |                 | RSD within-day (%) |                 |                 | RSD between-day (%) |                 |                 |
|---------------------------------|-------------------------------------------------------|------------------------------|------------------------------|-----------|-----------------|-----------------|-----------------|--------------------|-----------------|-----------------|---------------------|-----------------|-----------------|
|                                 |                                                       |                              |                              |           | 20 ng           | 60 ng           | 125 ng          | 20 ng              | 60 ng           | 125 ng          | 20 ng               | 60 ng           | 125 ng          |
|                                 |                                                       |                              |                              |           | L <sup>-1</sup> | L <sup>-1</sup> | L <sup>-1</sup> | L <sup>-1</sup>    | L <sup>-1</sup> | L <sup>-1</sup> | L <sup>-1</sup>     | L <sup>-1</sup> | L <sup>-1</sup> |
| ANTIB                           |                                                       |                              |                              |           |                 |                 |                 |                    |                 |                 |                     |                 |                 |
| AZI                             | 0.9995                                                | 3.29                         | 9.97                         | 100       | 99.52           | 96.06           | 98.62           | 0.20               | 4.40            | 0.84            | 0.07                | 4.15            | 0.48            |
| CIP                             | 0.9988                                                | 5.26                         | 15.93                        | 100.96    | 99.12           | 99.28           | 98.63           | 0.42               | 0.67            | 1.26            | 0.44                | 0.24            | 0.45            |
| CLA                             | 0.9999                                                | 1.51                         | 4.58                         | 98.77     | 98.57           | 94.03           | 98.59           | 0.67               | 4.33            | 1.40            | 0.58                | 6.85            | 1.30            |
| ERY                             | 0.9991                                                | 4.49                         | 13.60                        | 98.84     | 99.02           | 98.17           | 99.24           | 0.72               | 1.59            | 0.56            | 0.30                | 0.55            | 0.32            |
| LIP REG                         |                                                       |                              |                              |           |                 |                 |                 |                    |                 |                 |                     |                 |                 |
| BEZ                             | 0.9998                                                | 2.26                         | 6.84                         | 100.00    | 99.37           | 99.24           | 98.44           | 0.76               | 0.93            | 1.89            | 1.80                | 0.54            | 0.90            |
| GEM                             | 0.9994                                                | 3.78                         | 11.46                        | 94.02     | 99.78           | 96.84           | 98.75           | 0.71               | 4.88            | 1.17            | 1.18                | 0.70            | 0.72            |
| ANTIEPI                         |                                                       |                              |                              |           |                 |                 |                 |                    |                 |                 |                     |                 |                 |
| CAR                             | 0.9992                                                | 4.22                         | 12.80                        | 101.27    | 97.99           | 95.90           | 97.86           | 0.89               | 2.87            | 1.72            | 1.16                | 3.63            | 1.67            |
| SSRIS                           |                                                       |                              |                              |           |                 |                 |                 |                    |                 |                 |                     |                 |                 |
| CIT                             | 1.0000                                                | 1.13                         | 3.41                         | 100.00    | 98.60           | 98.74           | 97.51           | 0.66               | 1.26            | 2.03            | 1.52                | 0.42            | 2.01            |
| FLU                             | 0.9999                                                | 1.84                         | 5.59                         | 100.61    | 99.50           | 96.98           | 99.20           | 0.74               | 3.12            | 0.78            | 1.24                | 3.05            | 0.71            |
| SER                             | 0.9996                                                | 3.04                         | 9.22                         | 99.44     | 99.88           | 97.03           | 99.06           | 0.57               | 3.99            | 0.60            | 1.21                | 0.76            | 0.40            |
| ANTI-INF                        |                                                       |                              |                              |           |                 |                 |                 |                    |                 |                 |                     |                 |                 |
| DIC                             | 0.9991                                                | 4.61                         | 13.97                        | 101.96    | 98.33           | 98.47           | 98.85           | 1.10               | 1.58            | 0.91            | 1.48                | 0.90            | 1.12            |
| 4-OH-DIC                        | 0.9990                                                | 4.92                         | 14.92                        | 99.33     | 97.97           | 98.40           | 98.44           | 1.34               | 2.25            | 1.58            | 1.31                | 0.57            | 1.22            |
| IBU                             | 0.9994                                                | 3.66                         | 11.09                        | 93.55     | 97.66           | 99.40           | 99.17           | 1.45               | 1.79            | 1.10            | 0.51                | 0.66            | 0.59            |
| NAP                             | 0.9992                                                | 4.38                         | 13.27                        | 101.27    | 97.66           | 96.41           | 97.50           | 0.84               | 5.16            | 1.37            | 2.05                | 1.58            | 3.10            |

| Therapeutic group /<br>compound | Matrix Matched<br>Linearity ( $R^2$ ) | MDL<br>(ng L <sup>-1</sup> ) | MQL<br>(ng L <sup>-1</sup> ) | ME<br>(%) | Recovery (%)    |                 |                 | RSD within-day (%) |                 |                 | RSD between-day (%) |                 |                 |
|---------------------------------|---------------------------------------|------------------------------|------------------------------|-----------|-----------------|-----------------|-----------------|--------------------|-----------------|-----------------|---------------------|-----------------|-----------------|
|                                 |                                       |                              |                              |           | 20 ng           | 60 ng           | 125 ng          | 20 ng              | 60 ng           | 125 ng          | 20 ng               | 60 ng           | 125 ng          |
|                                 |                                       |                              |                              |           | L <sup>-1</sup> | L <sup>-1</sup> | L <sup>-1</sup> | L <sup>-1</sup>    | L <sup>-1</sup> | L <sup>-1</sup> | L <sup>-1</sup>     | L <sup>-1</sup> | L <sup>-1</sup> |
| PARA                            | 0.9995                                | 3.57                         | 10.82                        | 99.20     | 99.14           | 97.22           | 98.10           | 0.56               | 3.32            | 2.27            | 1.15                | 1.34            | 1.34            |
| HORM                            |                                       |                              |                              |           |                 |                 |                 |                    |                 |                 |                     |                 |                 |
| E1                              | 0.9987                                | 5.45                         | 16.53                        | 100.68    | 98.90           | 99.68           | 97.88           | 0.99               | 0.98            | 0.99            | 0.50                | 1.16            | 0.74            |
| E2                              | 0.9991                                | 4.56                         | 13.82                        | 102.68    | 96.68           | 95.16           | 96.65           | 0.92               | 2.76            | 1.98            | 2.21                | 5.01            | 0.94            |
| EE2                             | 0.9990                                | 4.94                         | 14.98                        | 99.44     | 99.07           | 96.86           | 97.45           | 0.37               | 5.47            | 1.47            | 0.60                | 3.60            | 0.86            |

MDL – Method detection limit; MQL – Method quantification limit; ME – Matrix effect; RSD – Relative standard deviation.

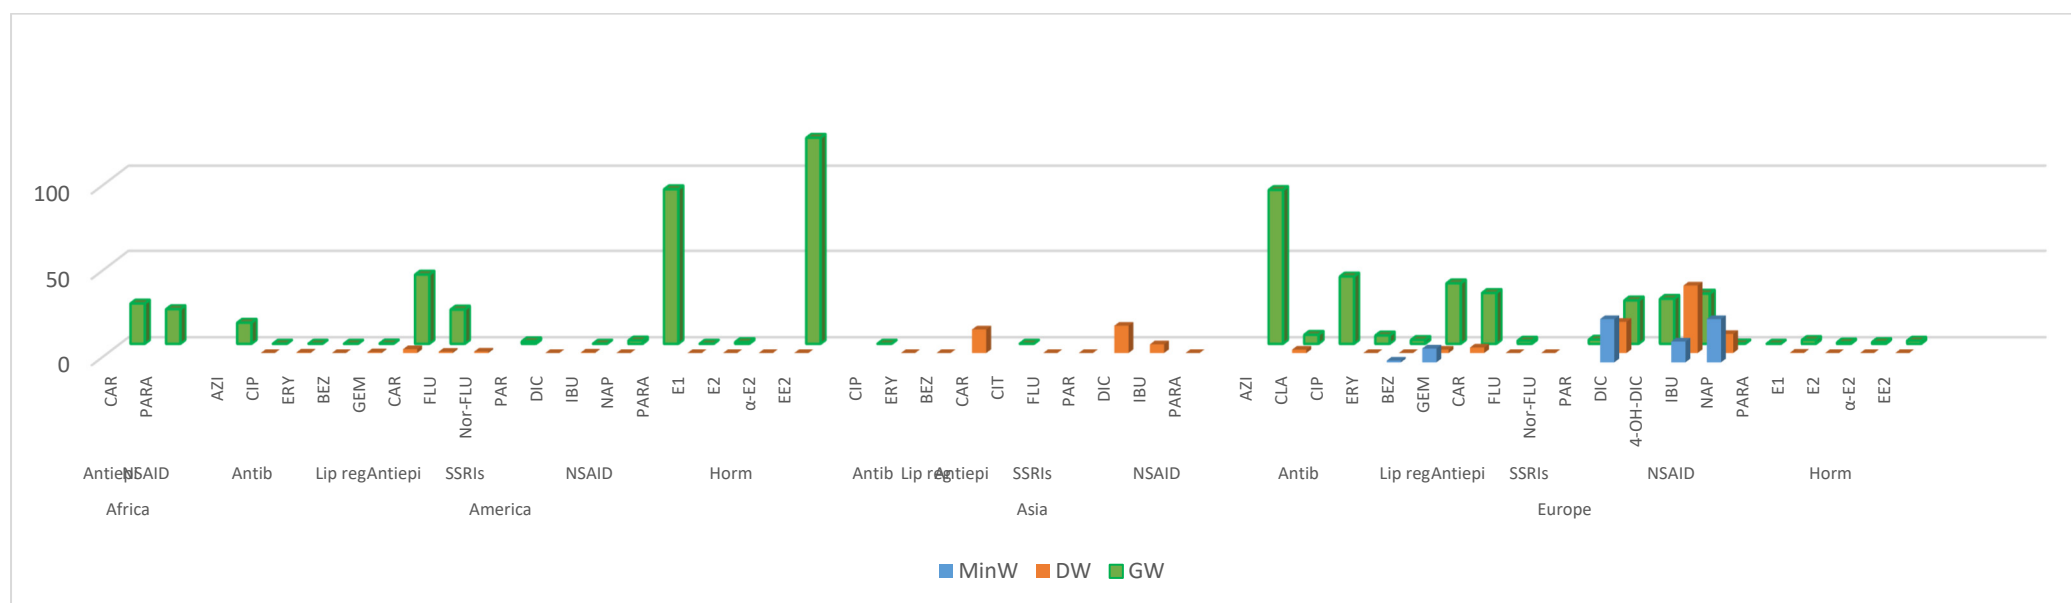

Figure S2. Median concentrations for each pharmaceutical in mineral, drinking and groundwaters by continent.

CIP – Ciprofloxacin; ERY – Erythromycin; AZI – Azithromycin; CLA – Clarithromycin; GEM – Gemfibrozil; BEZ - Bezafibrate (BEZ)), antiepileptics (Carbamazepine (CAR)), selective serotonin reuptake inhibitors (SSRIs) (Citalopram (CIT), Fluoxetine (FLU), Sertraline (SER)), non-steroidal anti-inflammatory drugs (NSAIDs) and analgesics, still referred to only as NSAIDs, (Diclofenac (DIC), 4-hydroxy-diclofenac (4-OH-DIC), Naproxen (NAP), Ibuprofen (IBU), Paracetamol (PARA)) and hormones (Es-trone (E1), 17 $\beta$ -estradiol (E2) and 17 $\alpha$ -ethinylestradiol (EE2))Anx—anxiolytics; Antib - Antibiotics; Antiepi - Antiepileptics; DW – Drinking water; GW – Groundwater; Horm—hormones; Lip reg - Lipid regulators; MinW – Mineral water; NSAIDs - Non-steroidal anti-inflammatory drugs; SSRIs – Selective serotonin reuptake inhibitors.
